# Supplementary material for: Inflammatory and metabolic responses to high-fat meals with and without dairy products in men
Source: PubMed Central journal article supplement — Br J Nutr. 2015 May 20;113(12):1853–61. doi: 10.1017/S0007114515000677 (PMC4498462; doi:10.1017/s0007114515000677), 2015-05-20
Supplement: S0007114515000677sup001.pdf [file S0007114515000677sup001.pdf]

## Supporting material

**Supplementary Table S1.** Mean values and standard deviations of blood parameters at time points 0 h, 1 h, 2 h, 4 h and 6 h separated by test meal

|                            | 0 h  |      | 1 h     |       | 2 h     |       | 4 h     |      | 6 h    |      |
|----------------------------|------|------|---------|-------|---------|-------|---------|------|--------|------|
|                            | Mean | SD   | Mean    | SD    | Mean    | SD    | Mean    | SD   | Mean   | SD   |
| <i>HFC meal</i>            |      |      |         |       |         |       |         |      |        |      |
| Glucose (mmol/L)           | 5.01 | 0.41 | 5.51    | 1.16  | 4.95    | 0.67  | 4.46**  | 0.32 | 4.33** | 0.29 |
| Insulin (mU/L)             | 9.78 | 8.77 | 48.45** | 54.31 | 30.79** | 30.53 | 12.93** | 8.97 | 7.29** | 6.72 |
| Total cholesterol (mmol/L) | 5.01 | 0.64 | 4.90*   | 0.66  | 4.88**  | 0.66  | 4.93    | 0.67 | 4.97   | 0.67 |
| LDL-cholesterol (mmol/L)   | 3.36 | 0.66 | 3.26**  | 0.66  | 3.19**  | 0.65  | 3.07**  | 0.63 | 3.15** | 0.60 |
| HDL-cholesterol (mmol/L)   | 1.40 | 0.34 | 1.36**  | 0.32  | 1.34**  | 0.31  | 1.27**  | 0.31 | 1.30** | 0.32 |
| Triglyceride (mmol/L)      | 1.38 | 0.71 | 1.79**  | 0.83  | 2.40**  | 1.01  | 2.66**  | 1.24 | 2.28** | 1.32 |
| CRP (mg/L)                 | 1.19 | 1.16 | 1.16**  | 1.15  | 1.14*   | 1.13  | 1.13**  | 1.13 | 1.12** | 1.11 |
| IL-6 (pg/mL)               | 2.99 | 1.09 | nd      | nd    | nd      | nd    | nd      | nd   | 5.12** | 2.71 |
| TNF- $\alpha$ (pg/mL)      | 3.63 | 1.30 | nd      | nd    | nd      | nd    | nd      | nd   | 3.45   | 1.35 |
| Endotoxin (EU/mL)          | 2.35 | 0.80 | nd      | nd    | nd      | nd    | nd      | nd   | 3.36** | 1.65 |

|                            | 0 h  |      | 1 h     |       | 2 h     |       | 4 h     |       | 6 h    |      |
|----------------------------|------|------|---------|-------|---------|-------|---------|-------|--------|------|
|                            | Mean | SD   | Mean    | SD    | Mean    | SD    | Mean    | SD    | Mean   | SD   |
| <i>HFD meal</i>            |      |      |         |       |         |       |         |       |        |      |
| Glucose (mmol/L)           | 5.03 | 0.48 | 5.70**  | 1.45  | 5.28    | 1.04  | 4.38**  | 0.38  | 4.35** | 0.51 |
| Insulin (mU/L)             | 9.53 | 6.52 | 49.24** | 46.00 | 39.44** | 37.95 | 14.93** | 13.74 | 7.77** | 6.83 |
| Total cholesterol (mmol/L) | 5.11 | 0.81 | 5.06    | 0.87  | 4.93**  | 0.84  | 5.04*   | 0.90  | 4.99   | 0.84 |
| LDL-cholesterol (mmol/L)   | 3.40 | 0.81 | 3.33**  | 0.85  | 3.18**  | 0.80  | 3.13**  | 0.81  | 3.14** | 0.79 |
| HDL-cholesterol (mmol/L)   | 1.44 | 0.42 | 1.40    | 0.37  | 1.35**  | 0.39  | 1.31**  | 0.37  | 1.32** | 0.40 |
| Triglyceride (mmol/L)      | 1.34 | 0.80 | 1.67**  | 0.91  | 2.15**  | 1.10  | 2.55**  | 1.37  | 2.24** | 1.26 |
| CRP (mg/L)                 | 1.36 | 1.58 | 1.35    | 1.60  | 1.32**  | 1.56  | 1.36    | 1.64  | 1.37   | 1.67 |
| IL-6 (pg/mL)               | 3.66 | 2.64 | nd      | nd    | nd      | nd    | nd      | nd    | 4.95** | 2.71 |
| TNF- $\alpha$ (pg/mL)      | 3.56 | 1.32 | nd      | nd    | nd      | nd    | nd      | nd    | 3.12** | 1.38 |
| Endotoxin (EU/mL)          | 2.30 | 0.75 | nd      | nd    | nd      | nd    | nd      | nd    | 3.17** | 1.39 |

|                          | 0 h  |      | 1 h     |       | 2 h     |       | 4 h     |      | 6 h    |      |
|--------------------------|------|------|---------|-------|---------|-------|---------|------|--------|------|
|                          | Mean | SD   | Mean    | SD    | Mean    | SD    | Mean    | SD   | Mean   | SD   |
| <i>HFM meal</i>          |      |      |         |       |         |       |         |      |        |      |
| Glucose (mmol)           | 5.08 | 0.45 | 5.41*   | 1.01  | 5.23    | 0.83  | 4.53**  | 0.53 | 4.45** | 0.47 |
| Insulin (mU)             | 9.69 | 8.08 | 46.47** | 47.80 | 34.00** | 26.37 | 15.97** | 9.65 | 8.91   | 6.58 |
| Total cholesterol (mmol) | 5.33 | 0.92 | 5.11**  | 0.89  | 5.13**  | 0.90  | 5.18**  | 0.92 | 5.16** | 0.87 |
| LDL-cholesterol (mmol)   | 3.57 | 0.88 | 3.44**  | 0.86  | 3.37**  | 0.85  | 3.19**  | 0.76 | 3.26** | 0.77 |
| HDL-cholesterol (mmol)   | 1.42 | 0.37 | 1.35**  | 0.33  | 1.33**  | 0.34  | 1.27**  | 0.35 | 1.27** | 0.33 |
| Triglyceride (mmol)      | 1.47 | 0.76 | 1.78**  | 0.86  | 2.32**  | 1.06  | 3.19**  | 1.64 | 2.69** | 1.52 |
| CRP (mg/L)               | 1.77 | 1.54 | 1.72**  | 1.52  | 1.69**  | 1.50  | 1.66**  | 1.47 | 1.65** | 1.47 |
| IL-6 (pg/mL)             | 3.92 | 2.92 | nd      | nd    | nd      | nd    | nd      | nd   | 5.54   | 4.40 |
| TNF- $\alpha$ (pg/mL)    | 3.57 | 1.48 | nd      | nd    | nd      | nd    | nd      | nd   | 3.36   | 1.21 |
| Endotoxin (EU/mL)        | 2.38 | 0.78 | nd      | nd    | nd      | nd    | nd      | nd   | 3.68** | 1.57 |

HFC meal, high-fat non-dairy control meal; HFD meal, high-fat dairy meal; HFM meal, high-fat non-dairy meal supplemented with milk; CRP, C-reactive protein; nd, values were not determined at these time points

\* Indicates a significant difference between t = 0 h and t = 1, 2, 4 or 6 h (\* $P \leq 0.05$ , \*\* $P \leq 0.01$ )
